# Supplementary material
Source: PubMed Central journal article supplement (PMC6613997)

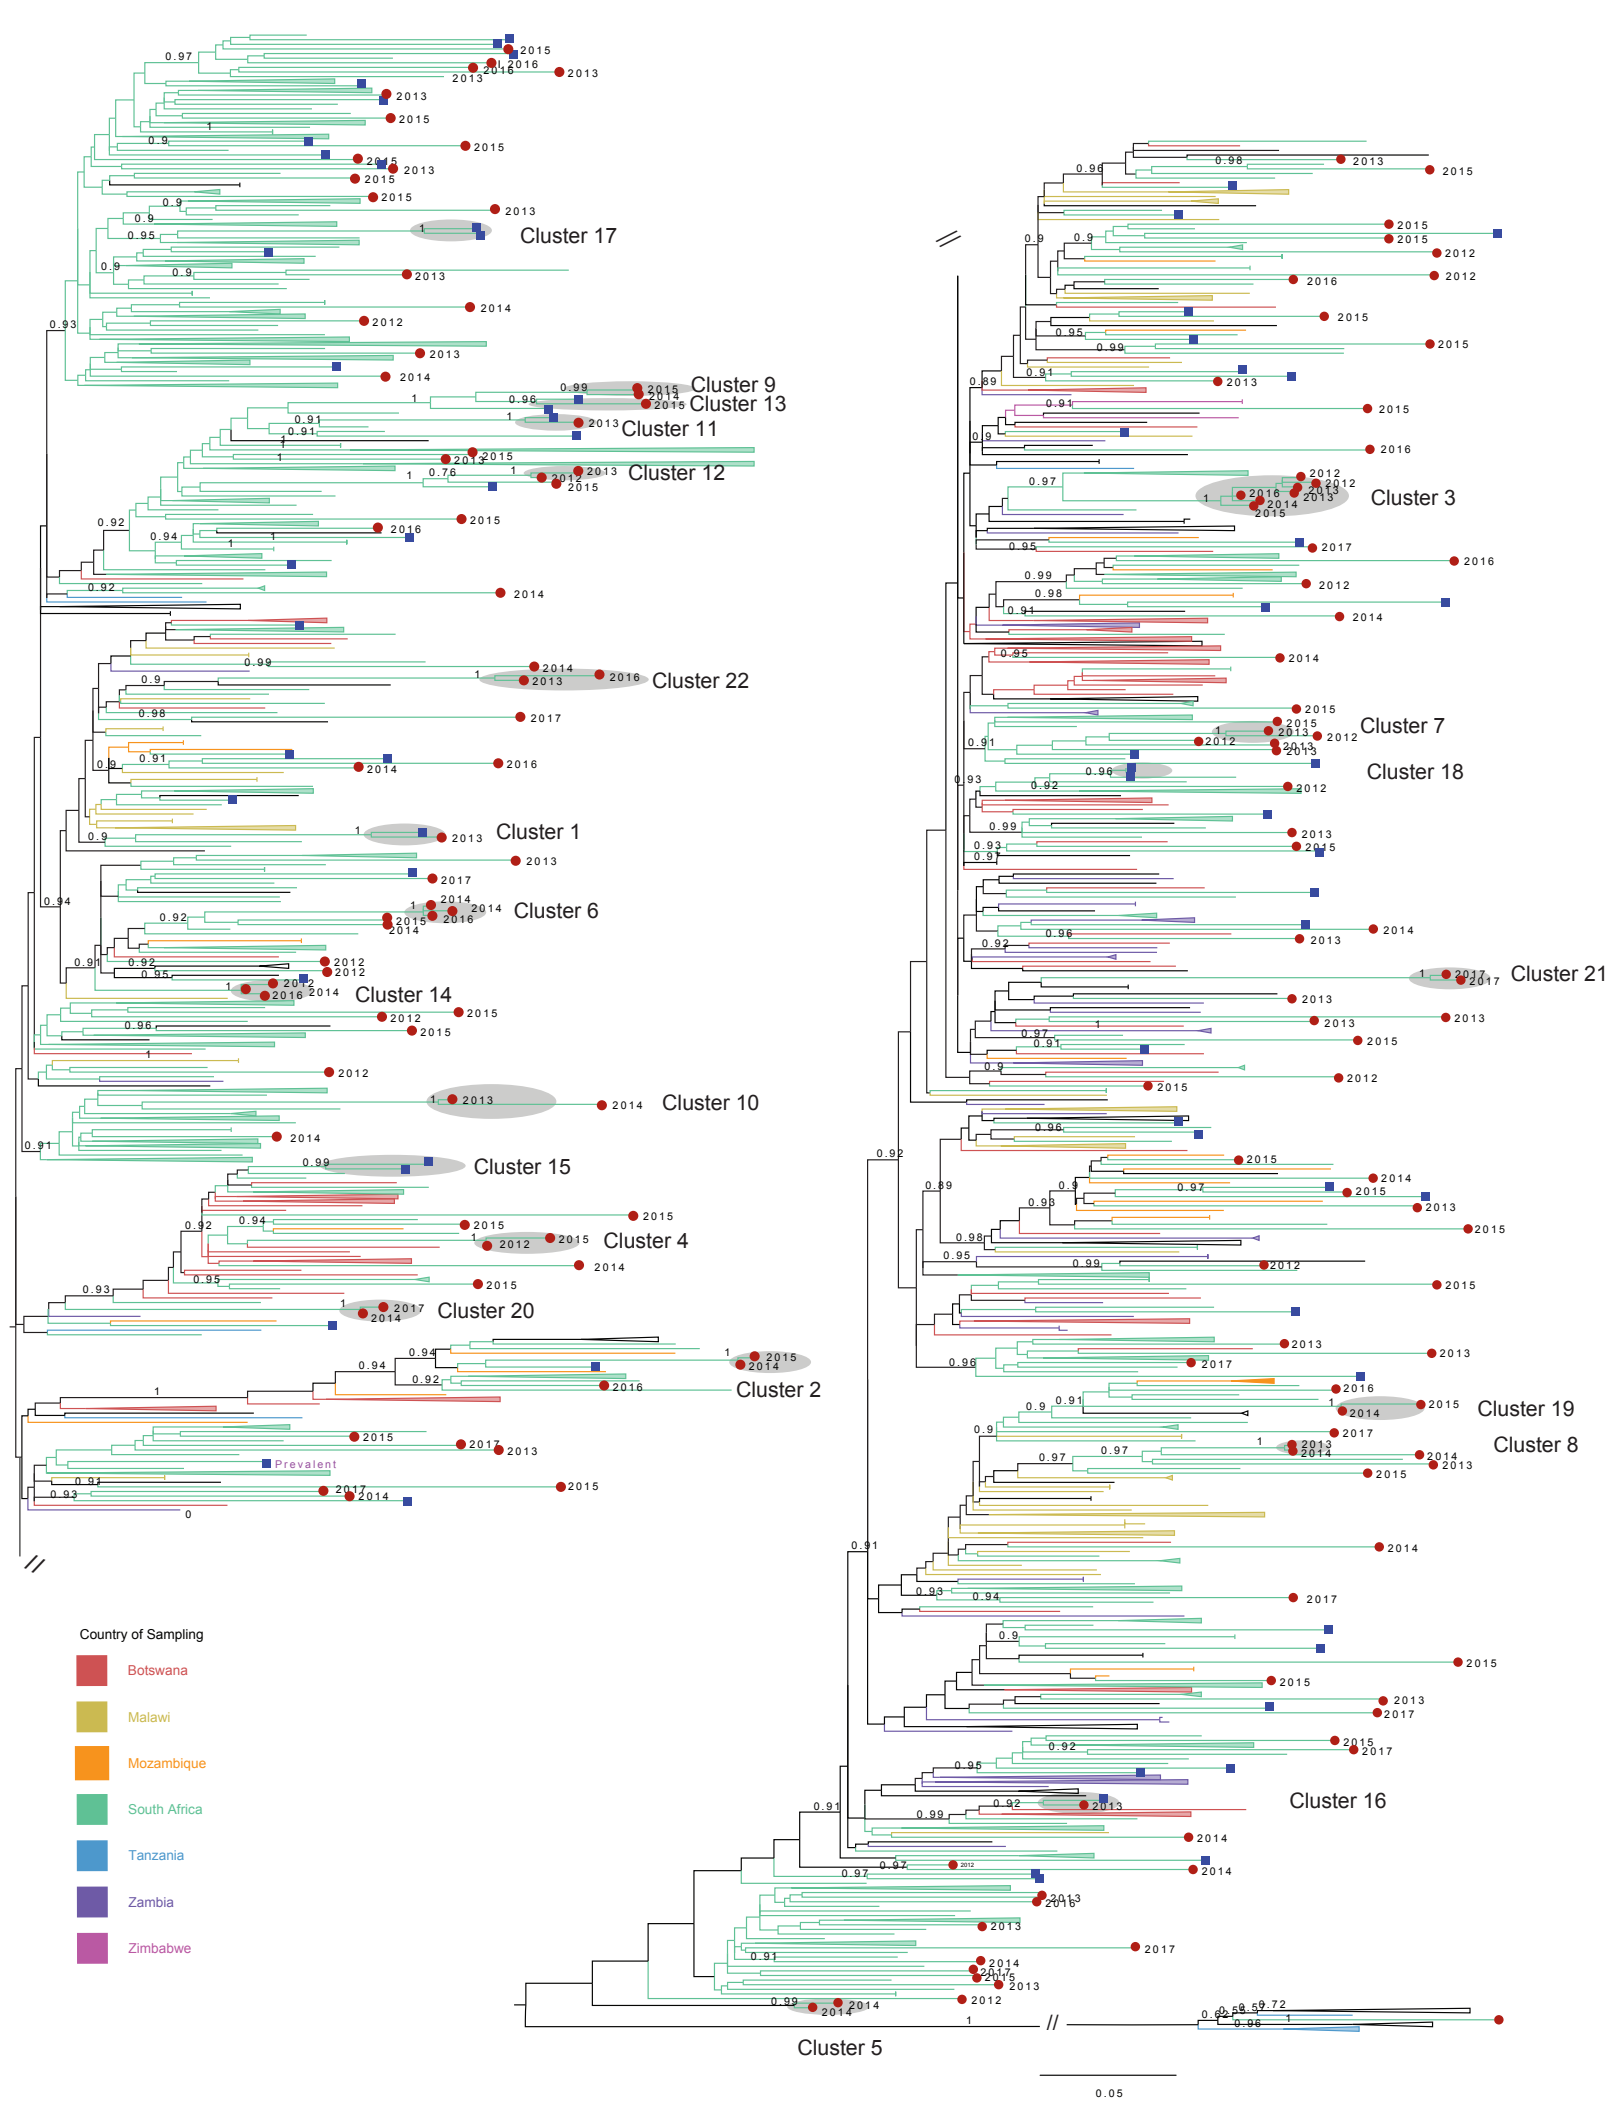

Supplement: NIHMS1020644-supplement-Supplemental_Content__figure_1.pdf [file NIHMS1020644-supplement-Supplemental_Content__figure_1.pdf]

# Pairwise distances among 228 HPTN 068 Sequences

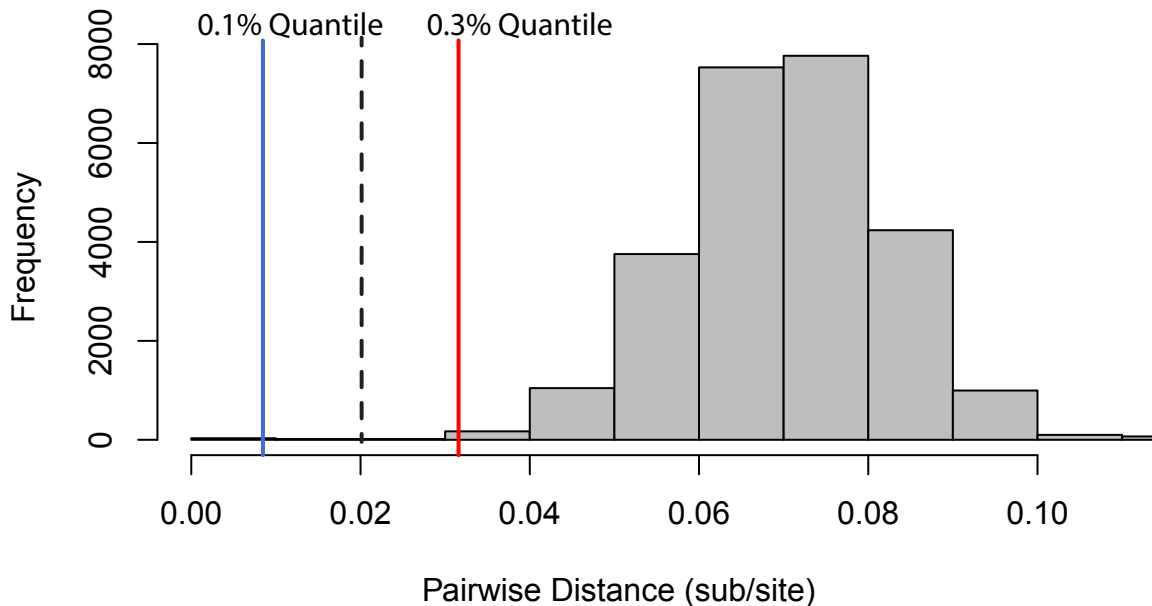

Supplement: NIHMS1020644-supplement-Supplemental_Content__figure_2.pdf [file NIHMS1020644-supplement-Supplemental_Content__figure_2.pdf]

# Pairwise distances among 228 HPTN 068 Sequences

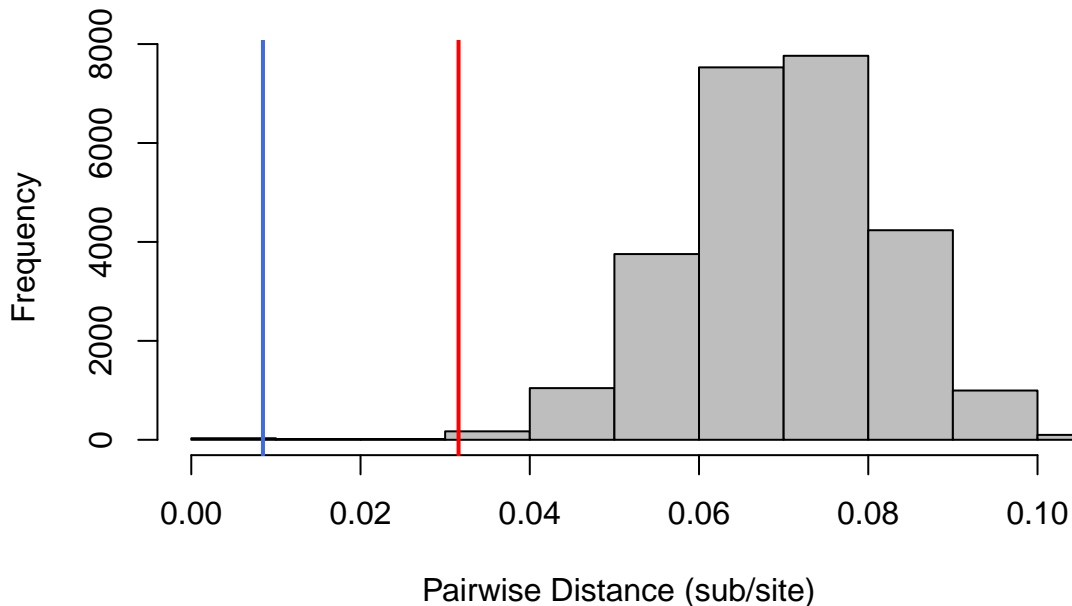

# Minimum pairwise distance for 51 cluster members

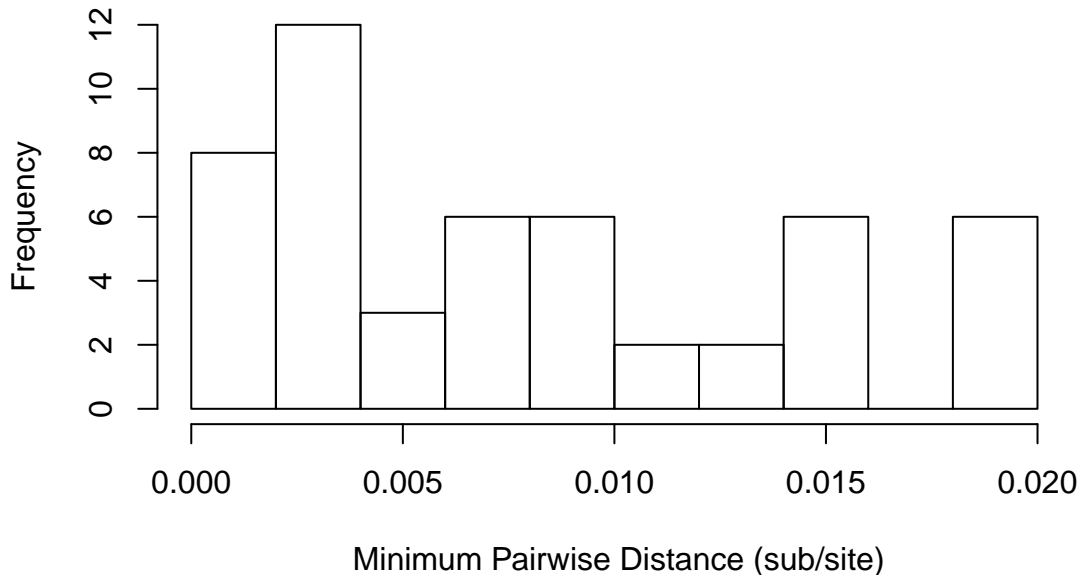

Supplement: NIHMS1020644-supplement-Supplemental_Content__figure_3.pdf [file NIHMS1020644-supplement-Supplemental_Content__figure_3.pdf]
